# Supplementary material for: Recycled PLA for 3D Printing: A Comparison of Recycled PLA Filaments from Waste of Different Origins after Repeated Cycles of Extrusion
Source: MDPI journal article supplement (doi:10.3390/polym15173651), 2023-09-04
Supplement: s1 [file s1]

Supporting Information

# Recycled PLA for 3D Printing: A Comparison of Recycled PLA Filaments from Waste of Different Origins after Repeated Cycles of Extrusion

David Hidalgo-Carvajal <sup>1,\*</sup>, Álvaro Hortal Muñoz <sup>1,2</sup>, José J. Garrido-González <sup>3</sup>, Ruth Carrasco-Gallego <sup>1</sup> and Victoria Alcázar Montero <sup>1,4,\*</sup>

<sup>1</sup> Escuela Técnica Superior de Ingenieros Industriales, Universidad Politécnica de Madrid, 28006 Madrid, Spain; ruth.carrasco@upm.es (R.C.-G.)

<sup>2</sup> Dirección de Compras Industrial y Cliente, Repsol, 28006 Madrid, Spain

<sup>3</sup> Facultad de C. Químicas, Universidad de Salamanca, 37008 Salamanca, Spain

<sup>4</sup> Grupo de Investigación Polímeros, Caracterización y Aplicaciones (POLCA), 28006 Madrid, Spain

\* Correspondence: david.hidalgo.carvajal@upm.es (D.H.-C.); mariavictoria.alcazar@upm.es (V.A.M.)

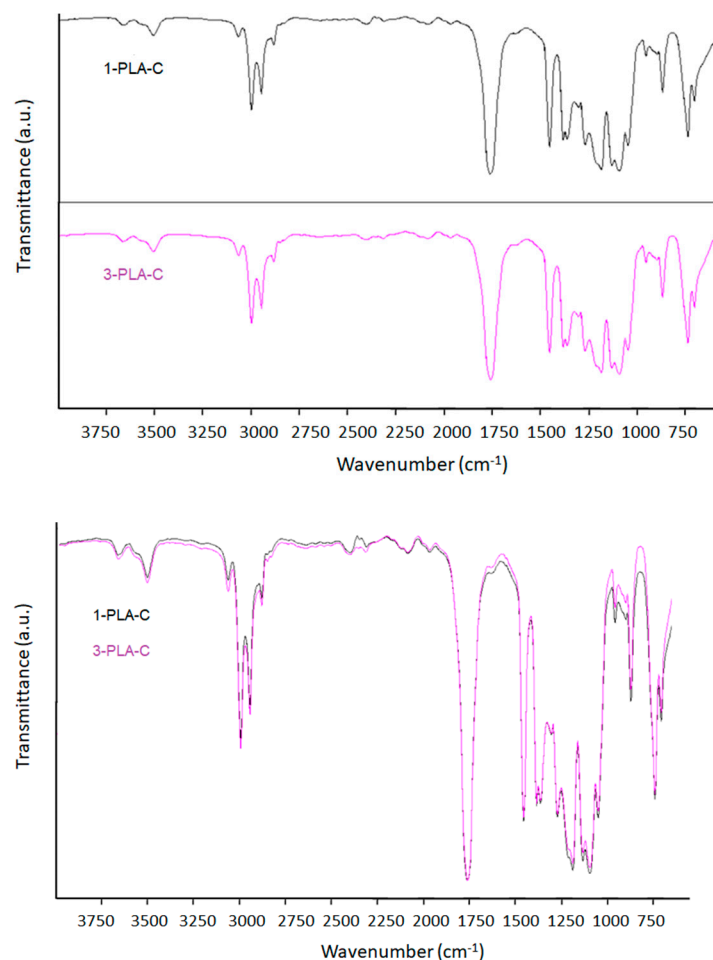

**Figure S1.** FTIR normalized spectra of 1-PLA-C and 3-PLA-C.

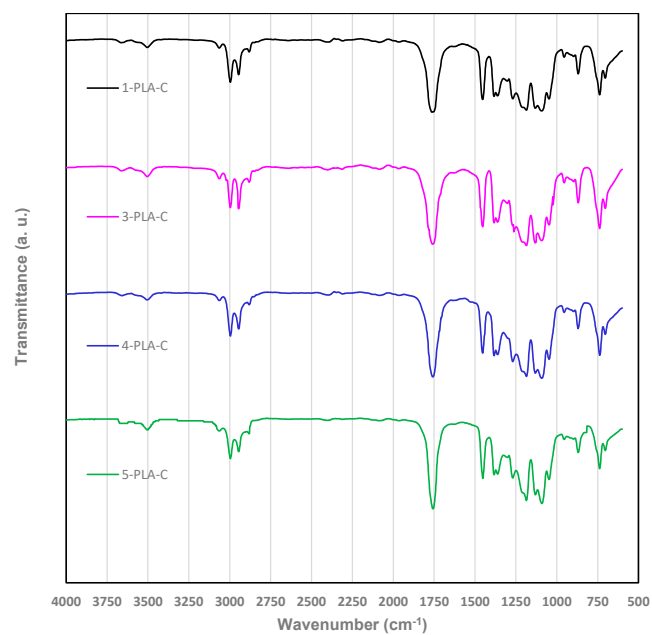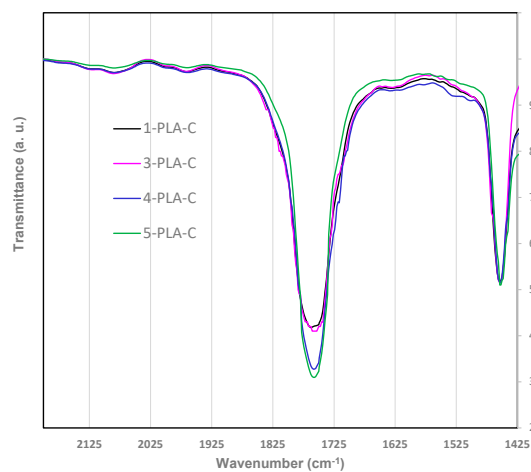

**Figure S2.** FTIR normalized spectra of PLA-C series. Expansion of the region 1425-2125  $\text{cm}^{-1}$ .

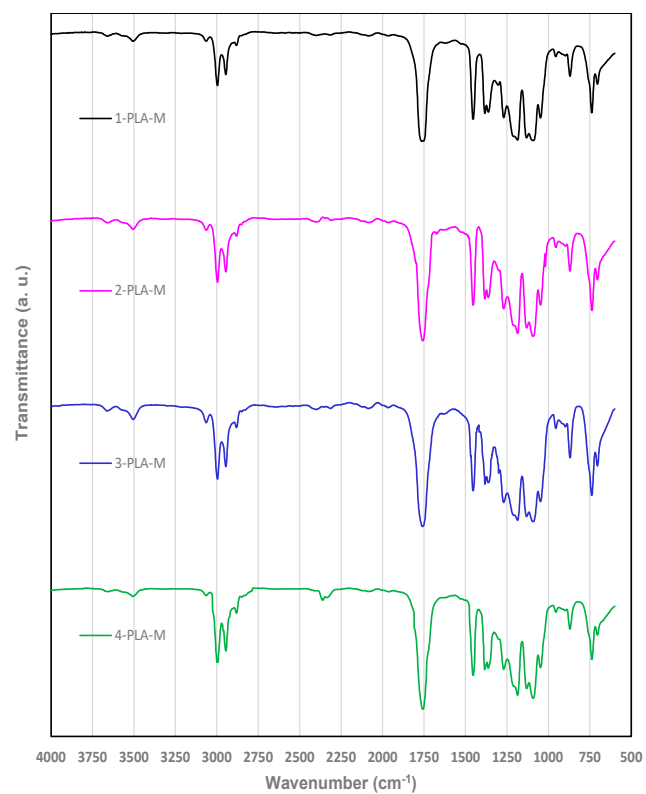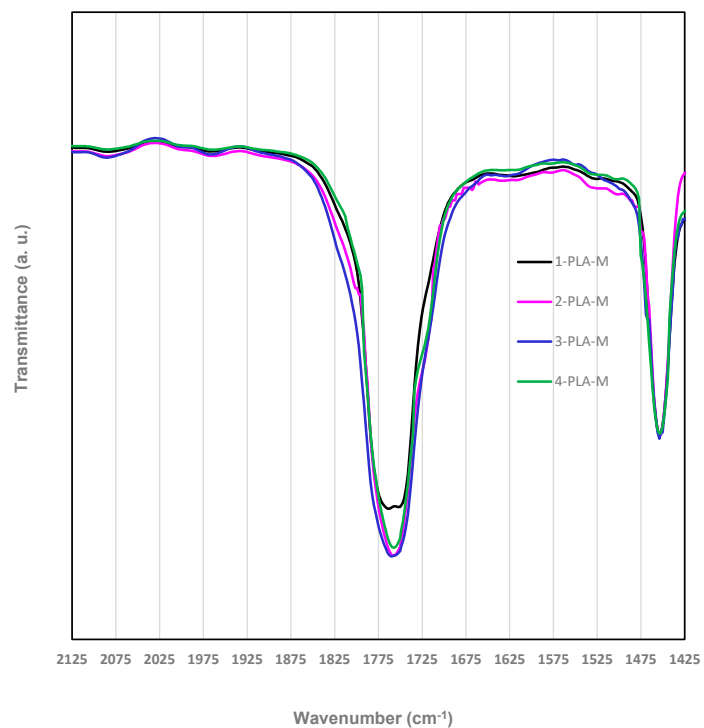

**Figure S3.** FTIR normalized spectra of PLA-M series. Expansion of the region 1425-2125 cm<sup>-1</sup>.

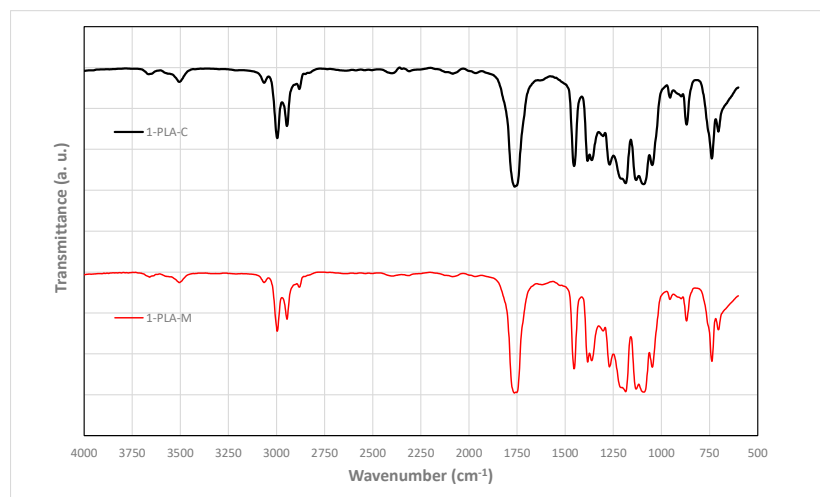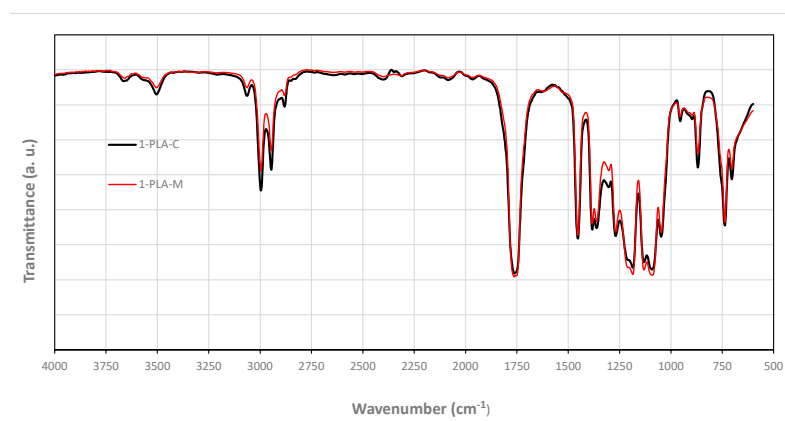

**Figure S4.** FTIR normalized spectra of 1-PLA-C and 1-PLA-M.
